# Supplementary material for: An Importance of Long-Term Clinical Analysis to Accurately Diagnose Calves Persistently and Acutely Infected by Bovine Viral Diarrhea Virus 2
Source: MDPI journal article supplement (doi:10.3390/v13122431), 2021-12-03
Supplement: s1 [file s1]

**Supplementary Table S1.** List of primers and probes used in BVDV genotyping by multiplex real-time RT-PCR.

| Target virus         | Function       | Sequence 5'-3'                  |
|----------------------|----------------|---------------------------------|
| Pestiviruses         | Forward primer | GATGCCATGTGGACGAGGGC            |
|                      | Reverse primer | CATGTGCCATGTACAGCAGAG           |
| Pestivirus A (BVDV1) | probe          | FAM-CAATACAGTGGGCCTCTGCAGCA-QSY |
| Pestivirus B (BVDV2) | probe          | VIC-GTGGCGTTATGGACACAGCCTG-QSY  |
| Pestivirus H         | probe          | ABY-ATCAGGCTGTACTCCCAAAG-QSY    |

**Supplementary Table S2.** List of primers used in phylogenetic analyses for 5'-untranslated region and E2 region from Pestiviruses.

| Target region          | Function       | Sequence 5'-3'        |
|------------------------|----------------|-----------------------|
| 5'-untranslated region | Forward primer | ATGCCCWTAGTAGGACTAGCA |
|                        | Reverse primer | TCAACTCCATGTGCCATGTAC |
| E2 region              | Forward primer | ACTTTGAATTTGGACTYTGCC |
|                        | Reverse primer | TCCAGGTCAAACCARTATTG  |
